# Supplementary material for: Characteristics of crystalline sputtered LaFeO3 thin films as photoelectrochemical water splitting photocathodes
Source: Royal Society of Chemistry journal article supplement (doi:10.1039/d0nr01762k), 2020-01-01
Supplement: d0nr01762k1.pdf [file d0nr01762k1.pdf]

## Supporting Information

### Characteristics of crystalline sputtered LaFeO<sub>3</sub> thin film for photoelectrochemical water splitting photocathode

Min-Kyu Son<sup>1,4\*</sup>, Hyunwoong Seo<sup>2</sup>, Motonori Watanabe<sup>1</sup>, Masaharu Shiratani<sup>3,4</sup>, Tatsumi Ishihara<sup>1</sup>

<sup>1</sup>Molecular Photoconversion Devices Research Division, International Institute for Carbon-Neutral Energy Research (I<sup>2</sup>CNER), Kyushu University, 744 Motooka, Nishi-ku, Fukuoka 819-0395, Japan

<sup>2</sup>Department of Energy Engineering, Inje University, 197 Inje-ro, Gimhae-si, Gyeongsangnam-do 50834, Republic of Korea

<sup>3</sup>Faculty of Information Science and Electrical Engineering, Kyushu University, 744 Motooka, Nishi-ku, Fukuoka 819-0395, Japan

<sup>4</sup>Center of Plasma Nano-interface Engineering, Kyushu University, 744 Motooka, Nishi-ku, Fukuoka 819-0395, Japan

\*E-mail: [minkyu.son@i2cner.kyushu-u.ac.jp](mailto:minkyu.son@i2cner.kyushu-u.ac.jp)

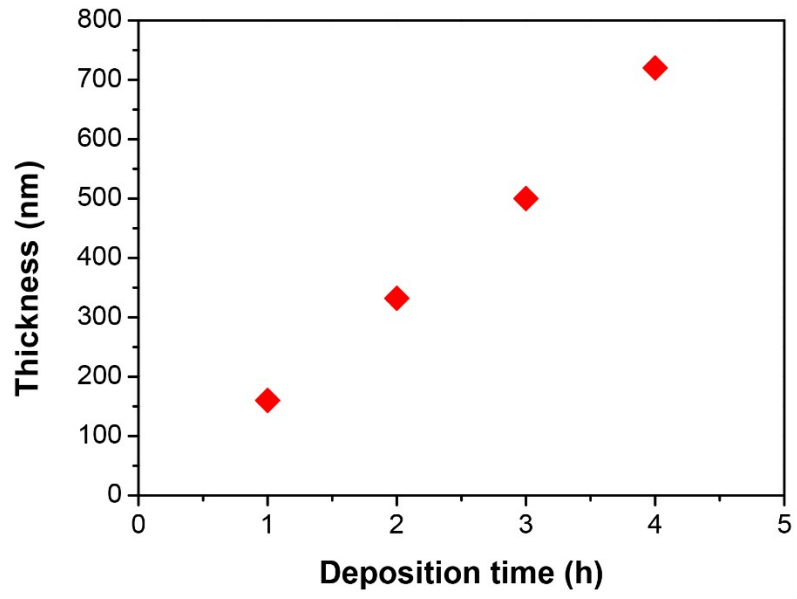

**Figure S1.** Thickness of sputtered LaFeO<sub>3</sub> film on Si wafer along with the deposition time.

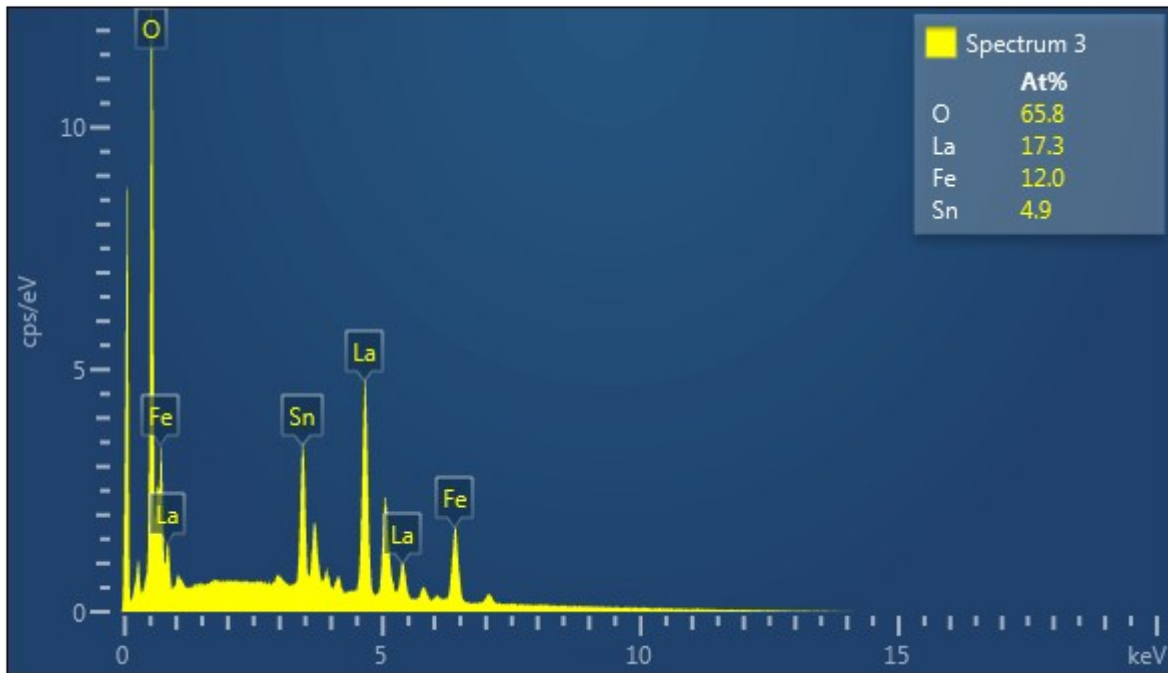

**Figure S2.** Compositional analysis of the crystalline sputtered  $\text{LaFeO}_3$  film with post annealing process in air at 550 °C from EDX characterization.

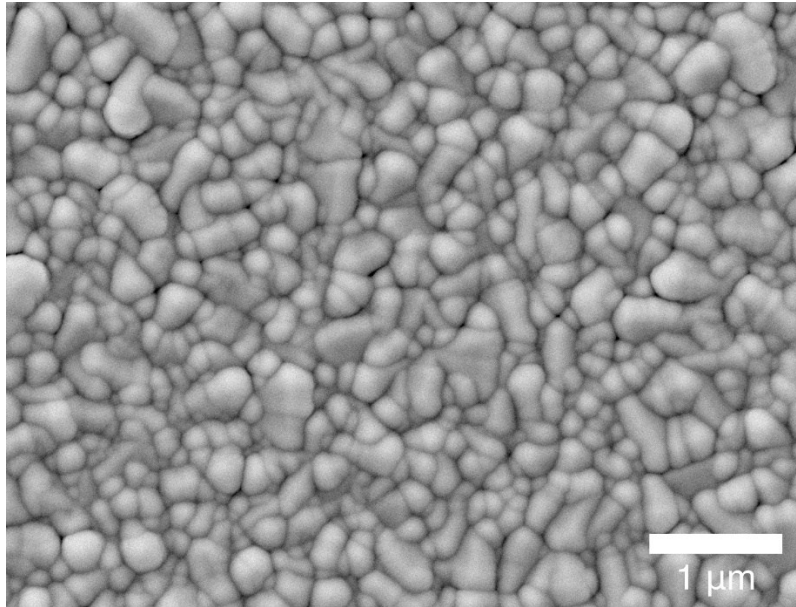

**Figure S3.** Top-view SEM image of the pristine sputtered LaFeO<sub>3</sub> film before post annealing process.

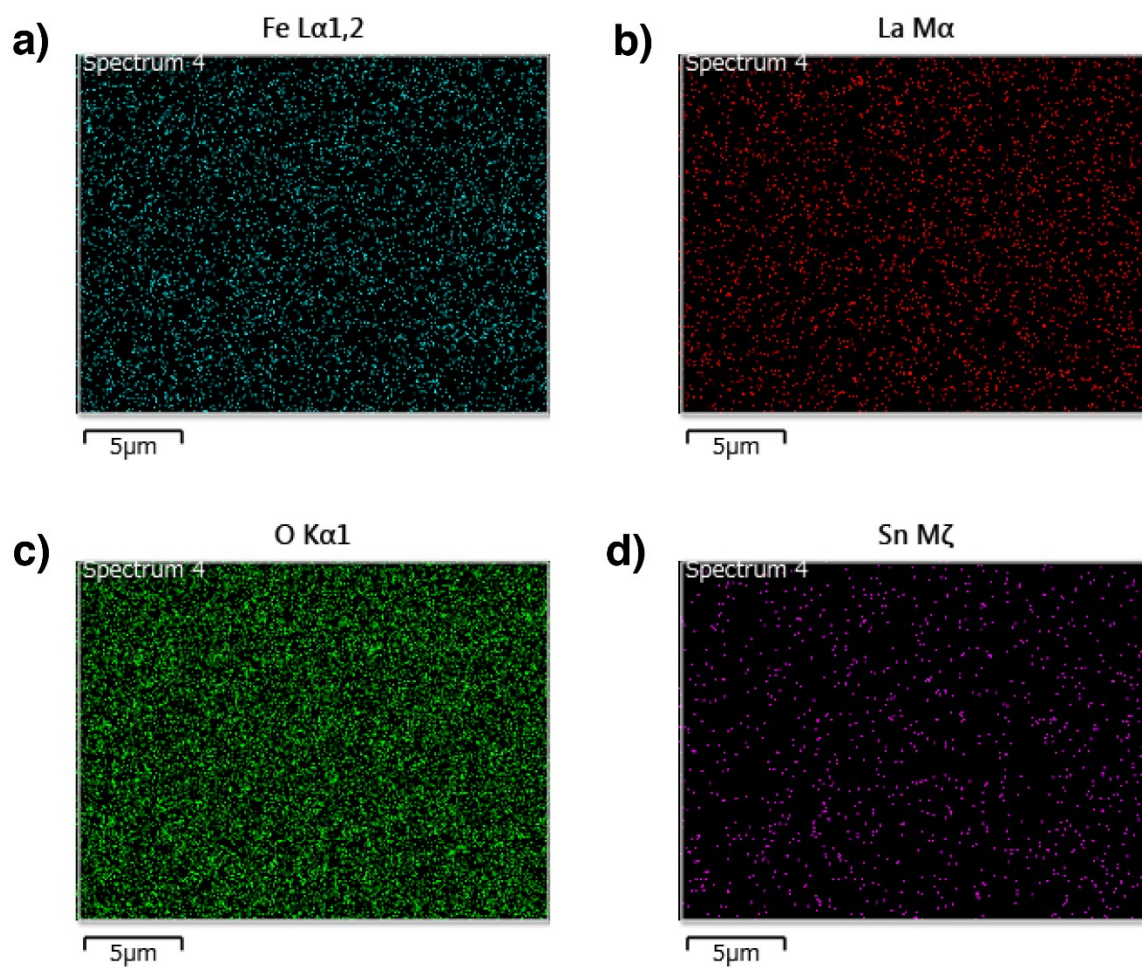

**Figure S4.** Element mapping of the crystalline sputtered  $\text{LaFeO}_3$  film with post annealing process in air at 550 °C from EDX characterization: a) Fe, b) La, c) O and d) Sn, respectively.

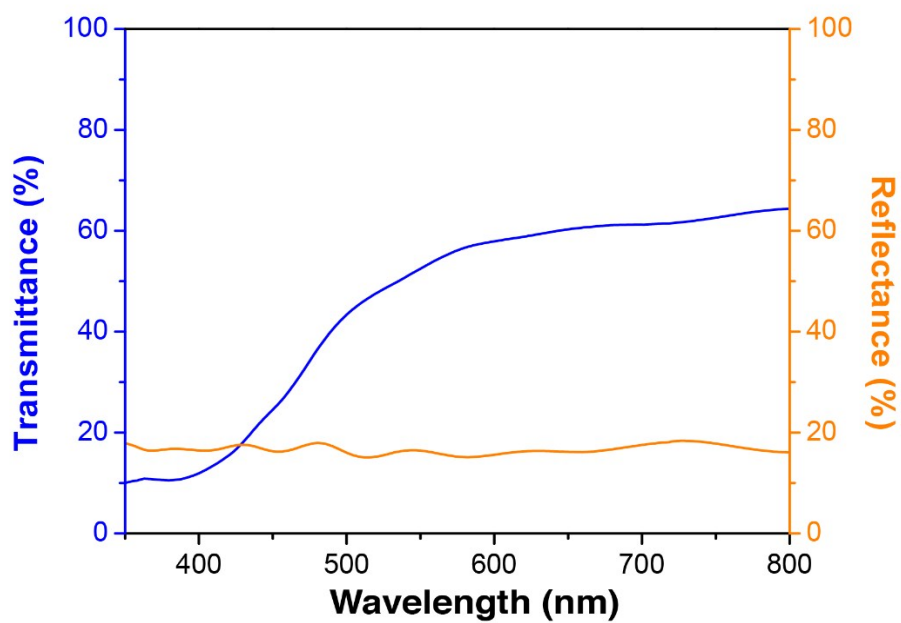

**Figure S5.** Transmittance and reflectance of the crystalline sputtered LaFeO<sub>3</sub> film on the FTO substrate.

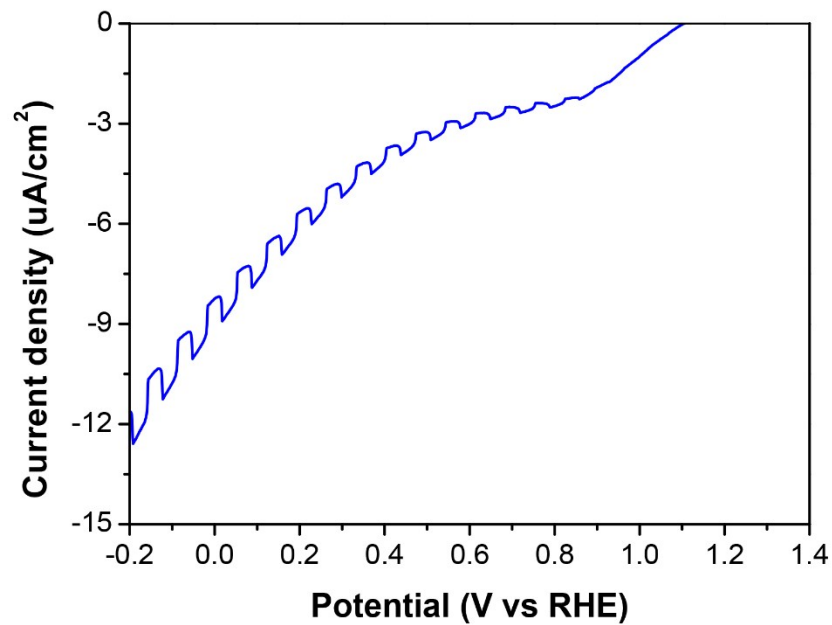

**Figure S6.** Current density-potential (J-E) characteristics of amorphous sputtered LaFeO<sub>3</sub> photocathode in strong alkaline solution (pH 13.6) under chopped one sun illumination.

**Table S1.** Photoelectrochemical performances of LaFeO<sub>3</sub> photocathode in other literatures and our work.

| Fabrication method   | Photocathode composition                                                             | Electrolyte                                                                                      | Current density ( $\mu\text{A cm}^{-2}$ )   | Onset potential (V vs RHE) | Stability                       | Ref.     |
|----------------------|--------------------------------------------------------------------------------------|--------------------------------------------------------------------------------------------------|---------------------------------------------|----------------------------|---------------------------------|----------|
| Electrodeposition    | LaFeO <sub>3</sub>                                                                   | 0.1 M NaOH saturated with O <sub>2</sub> , pH 13 (0.1 M NaOH, pH 13)                             | -95 at 0.75 V vs RHE (-1.5 at 0.5 V vs RHE) | 1.41 (1.27)                | 1 hr (1 hr)                     | 23       |
| Electrodeposition    | K-doped LaFeO <sub>3</sub>                                                           | 0.1 M NaOH saturated with O <sub>2</sub> , pH 13 (0.1 M NaOH, pH 13)                             | -268 at 0.6 V vs RHE (-11 at 0.6 V vs RHE)  | 1.2 (1.2)                  | 15 hr (-)                       | 24       |
| Spray pyrolysis      | LaFeO <sub>3</sub>                                                                   | 0.1 M NaOH, pH 13                                                                                | -160 at 0.26 V vs RHE                       | 1.2                        | 20 hr (20% decrease)            | 25       |
| Spray pyrolysis      | Ag incorporated LaFeO <sub>3</sub>                                                   | 0.1 M NaOH, pH 13                                                                                | -74 at 0.6 V vs RHE                         | 1.2                        | 24 hr (5 % decrease)            | 26       |
| Spray pyrolysis      | Ni incorporated LaFeO <sub>3</sub>                                                   | 0.1 M NaOH, pH 13                                                                                | -66 at 0.6 V vs RHE                         | 1.2                        | 20 hr                           | 27       |
| Sol-gel spin coating | LaFeO <sub>3</sub> with Au buffer layer                                              | 0.1 M Na <sub>2</sub> SO <sub>4</sub> , pH 7                                                     | -19 at 0.6 V vs RHE                         | 1.0                        | 50 min                          | 28       |
| Sol-gel spin coating | Ni-B catalysed LaFeO <sub>3</sub>                                                    | 0.1 M Na <sub>2</sub> SO <sub>4</sub> , pH 7                                                     | -23 at 0.6 V vs RHE                         | 1.0                        | 3.8 hr (82% decrease)           | 29       |
| Spray pyrolysis      | Dye-sensitized LaFeO <sub>3</sub> (NiP catalysed dye sensitized LaFeO <sub>3</sub> ) | 1.0 M KOH saturated with O <sub>2</sub> , pH 13.6 (0.5 M Na <sub>2</sub> SO <sub>4</sub> , pH 3) | -150 at 0.75 V vs RHE (-20 at 0.6 V vs RHE) | 1.3 (1.1)                  | 400 sec (400 sec, 20% decrease) | 31       |
| RF sputtering        | LaFeO <sub>3</sub>                                                                   | 0.1 M NaOH, pH 13.6                                                                              | -25 at 0V vs RHE                            | 1.3                        | 30 min                          | Our work |
